# Supplementary material for: Hydrogenation of dinitrogen to ammonia in [WF(PH2(CH2)2PH2)2N2] using H2: Insights from DFT calculations
Source: Royal Society of Chemistry journal article supplement (doi:10.1039/c2nj20929b), 2012-01-01

## Supporting information

# Hydrogenation of Dinitrogen to Ammonia in [WF(PH<sub>2</sub>(CH<sub>2</sub>)<sub>2</sub>PH<sub>2</sub>)<sub>2</sub>N<sub>2</sub>] Using H<sub>2</sub>: Insights From DFT Calculations

Perumal Balu<sup>b</sup>, Sambath Baskaran<sup>a</sup>, Venu Kannappan<sup>b</sup> and Chinnappan Sivasankar<sup>a\*</sup>

<sup>a</sup>Department of Chemistry, School of Physical, Chemical and Applied Sciences Pondicherry

University, Puducherry 605 014, India

<sup>b</sup>Postgraduate and Research Department of Chemistry, Presidency College,

Chennai 600 005. Tamil Nadu India.

**Table S1.** Calculated energies for model systems **1-7**

| S.No | Systems                                                         | Energy<br>(Hartree) | ZPE<br>(Hartree) | Entropy<br>(cal/mol) | Solvation( kcal/mol) |         |        |
|------|-----------------------------------------------------------------|---------------------|------------------|----------------------|----------------------|---------|--------|
|      |                                                                 |                     |                  |                      | Heptane              | Toluene | THF    |
| 1    | [F-W-N≡N] (1)                                                   | -465.174248         | 0.197567         | 141.281              | -5.99                | -7.71   | -14.70 |
| 2    | [F-W-N=N-H] <sup>+</sup> (2)                                    | -465.5791775        | 0.209773         | 143.544              | -22.67               | -27.91  | -44.19 |
| 3    | [F-W-N-NH <sub>2</sub> ] (3)                                    | -466.3371628        | 0.219320         | 148.358              | -5.28                | -7.26   | -13.42 |
| 4    | [F-W≡N] <sup>+</sup> (4)                                        | -410.2341221        | 0.195300         | 140.964              | -25.41               | -31.29  | -50.51 |
| 5    | [F-W=N-H] (5)                                                   | -411.0155501        | 0.202486         | 138.401              | -5.00                | -6.44   | -12.52 |
| 6    | [F-W-NH <sub>2</sub> ] <sup>+</sup> (6)                         | -411.4746193        | 0.217546         | 141.403              | -21.96               | -26.80  | -42.19 |
| 7    | [F-W-NH <sub>3</sub> ] (7)                                      | -412.1906468        | 0.226509         | 142.949              | -5.57                | -7.51   | -15.02 |
| 8    | N <sub>2</sub>                                                  | -109.4808546        | 0.005165         | 45.885               | -0.87                | -0.48   | -0.37  |
| 9    | NH <sub>3</sub>                                                 | -56.54808390        | 0.033179         | 44.443               | -3.05                | -1.69   | -1.32  |
| 10   | [NH(ipr) <sub>2</sub> ]                                         | -292.3791170        | 0.206053         | 94.474               | -2.20                | -1.03   | -0.76  |
| 11   | [NH <sub>2</sub> (ipr) <sub>2</sub> ] <sup>+</sup>              | -292.7721990        | 0.221554         | 95.231               | -45.02               | -28.50  | -23.20 |
| 12   | [B(C <sub>6</sub> F <sub>5</sub> ) <sub>3</sub> ]               | -2208.2425824       | 0.151209         | 194.307              | -10.23               | -5.18   | -3.85  |
| 13   | [BH(C <sub>6</sub> F <sub>5</sub> ) <sub>3</sub> ] <sup>-</sup> | -2208.9745998       | 0.159494         | 195.337              | -32.34               | -20.56  | -16.76 |

### Cartesian coordinates of optimized geometries (in Å)

#### [F-W(PH<sub>2</sub>(CH<sub>2</sub>)<sub>2</sub>PH<sub>2</sub>)<sub>2</sub>N<sub>2</sub>] (1)

|   |             |             |             |
|---|-------------|-------------|-------------|
| W | 0.00001600  | -0.00002900 | 0.00959200  |
| P | -1.91490800 | 1.59361400  | 0.13689100  |
| H | -2.10499900 | 2.71311200  | -0.74711400 |
| P | -1.91784500 | -1.59915000 | 0.12422200  |
| H | -2.28985800 | -2.35153100 | -1.04500400 |
| P | 1.91448300  | -1.59382500 | 0.13857100  |
| H | 2.10482100  | -2.71379600 | -0.74473400 |
| P | 1.91780700  | 1.59953900  | 0.12154000  |
| C | -3.61265500 | 0.70104800  | -0.10570300 |
| C | -3.58041700 | -0.69698500 | 0.53309800  |
| H | -3.77595800 | 0.63322400  | -1.18821700 |
| H | -4.41153700 | 1.31476100  | 0.32493300  |
| H | -4.42121200 | -1.31042200 | 0.19143500  |
| H | -3.62738300 | -0.62602600 | 1.62664100  |
| F | 0.00091700  | 0.00194600  | 2.06173500  |
| N | 0.00021900  | -0.00100200 | -1.94205100 |
| N | 0.00098000  | -0.00151500 | -3.12834700 |
| H | 2.29079300  | 2.34829600  | -1.04967100 |
| H | -2.14507300 | 2.27677700  | 1.38488000  |
| H | -1.99256500 | -2.67186800 | 1.08261500  |
| C | 3.57940400  | 0.69723300  | 0.53389600  |
| C | 3.61238700  | -0.70129000 | -0.10360200 |
| H | 4.42104000  | 1.31002100  | 0.19316100  |
| H | 3.62437900  | 0.62717500  | 1.62756900  |
| H | 3.77658200  | -0.63442800 | -1.18603400 |
| H | 4.41102300  | -1.31439900 | 0.32831200  |
| H | 1.99278200  | 2.67482400  | 1.07697800  |
| H | 2.14397800  | -2.27617900 | 1.38709500  |

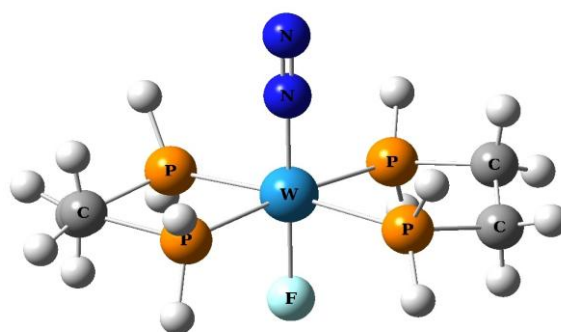

**[F-W-N=NH(dpe)]<sup>+1</sup> (2)**

|   |             |             |             |
|---|-------------|-------------|-------------|
| W | -0.01527900 | 0.00315900  | 0.05048600  |
| P | 1.93392600  | 1.62912900  | -0.23163400 |
| H | 2.13744400  | 2.74078000  | 0.64247300  |
| P | 1.91662300  | -1.63814700 | -0.28030300 |
| H | 2.33005500  | -2.36807900 | 0.87615200  |
| P | -1.98026500 | -1.63261900 | -0.08813600 |
| H | -2.17818400 | -2.69249000 | 0.84941800  |
| P | -1.97739400 | 1.64378400  | -0.08245400 |
| C | 3.59328100  | 0.67909300  | -0.09535500 |
| C | 3.50658300  | -0.69206700 | -0.79417000 |
| H | 3.80263300  | 0.56405300  | 0.97458700  |
| H | 4.39477300  | 1.28241600  | -0.53332800 |
| H | 4.38284800  | -1.30202400 | -0.55310700 |
| H | 3.46447900  | -0.57680700 | -1.88346900 |
| F | -0.16419100 | 0.02841800  | -1.92192600 |
| N | 0.19300900  | -0.01981200 | 1.87244500  |
| N | 0.57048600  | -0.04419400 | 3.09592400  |
| H | -2.42070700 | 2.27165100  | 1.12268200  |
| H | 2.02909700  | 2.27095000  | -1.50527500 |
| H | 1.85826100  | -2.68945000 | -1.24679000 |
| C | -3.53311400 | 0.69700300  | -0.68569700 |
| C | -3.64824800 | -0.68446100 | -0.01115200 |
| H | -4.42580500 | 1.29823100  | -0.48657200 |
| H | -3.42670500 | 0.59591500  | -1.77194700 |
| H | -3.91273700 | -0.58456000 | 1.04836900  |
| H | -4.42668900 | -1.28239200 | -0.49547900 |
| H | -1.95272100 | 2.77158000  | -0.96115500 |
| H | -2.08297600 | -2.35151300 | -1.31953800 |
| H | -0.21351900 | -0.01935400 | 3.78192400  |

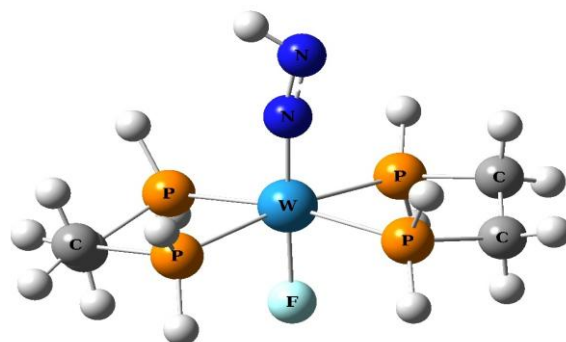

**[F-W-N-NH<sub>2</sub>(dpe)] (3)**

|   |             |             |             |
|---|-------------|-------------|-------------|
| W | -0.00333300 | -0.00051400 | 0.05577600  |
| P | 1.85708900  | 1.61910400  | -0.22065700 |
| H | 2.15328100  | 2.69126100  | 0.69449500  |
| P | 1.85126000  | -1.57797500 | -0.38341200 |
| H | 2.38523900  | -2.47917800 | 0.62007900  |
| P | -1.92619600 | -1.61306400 | -0.18023700 |
| H | -2.18674100 | -2.75126400 | 0.65883000  |
| P | -1.95589400 | 1.62275800  | 0.04717400  |
| C | 3.57605000  | 0.72445500  | -0.22496200 |
| C | 3.47293900  | -0.64657900 | -0.91368500 |
| H | 3.87072900  | 0.61525400  | 0.82625300  |
| H | 4.31448200  | 1.36274600  | -0.72330300 |
| H | 4.34123400  | -1.27438200 | -0.68346700 |
| H | 3.41311700  | -0.52871700 | -2.00248900 |
| F | -0.36224600 | 0.16034100  | -2.01074400 |
| N | 0.03741600  | -0.04482200 | 1.91894300  |
| N | 0.74303800  | -0.24927600 | 3.06677300  |
| H | -2.45135200 | 2.16914800  | 1.28182600  |
| H | 1.94785400  | 2.36922300  | -1.44859700 |
| H | 1.79740100  | -2.54605000 | -1.45480500 |
| C | -3.52638600 | 0.72053200  | -0.61986300 |
| C | -3.62723300 | -0.70341700 | -0.04149200 |
| H | -4.42032500 | 1.30643800  | -0.37885500 |
| H | -3.41215400 | 0.68938300  | -1.70970400 |
| H | -3.88317200 | -0.67309100 | 1.02541800  |
| H | -4.39684300 | -1.28462300 | -0.56161100 |
| H | -2.02261700 | 2.81622800  | -0.75334100 |
| H | -2.07878800 | -2.24490500 | -1.46103500 |
| H | 0.25579100  | -0.20015200 | 3.95282000  |
| H | 1.65046400  | -0.71597500 | 3.04376800  |

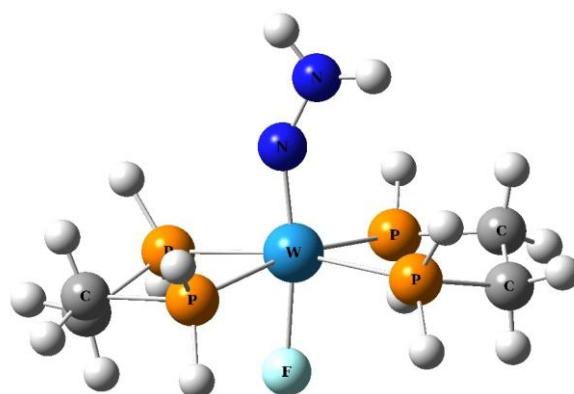

**[F-W≡N (dpe)]<sup>+1</sup> (4)**

|   |             |             |             |
|---|-------------|-------------|-------------|
| W | 0.00007900  | -0.00005500 | 0.31320700  |
| P | 1.98398200  | 1.65100800  | -0.01518800 |
| H | 2.28807000  | 2.65388000  | 0.95038100  |
| P | 1.94120100  | -1.68237100 | -0.08232400 |
| H | 2.54616700  | -2.33906200 | 1.02900400  |
| P | -1.98412300 | -1.65103200 | -0.01403300 |
| H | -2.28910500 | -2.65295400 | 0.95224600  |
| P | -1.94107900 | 1.68244600  | -0.08103200 |
| C | 3.60012000  | 0.63962700  | -0.15543200 |
| C | 3.35956300  | -0.69639900 | -0.89050600 |
| H | 3.96112900  | 0.47372000  | 0.86585800  |
| H | 4.35172600  | 1.23339800  | -0.68498700 |
| H | 4.27281700  | -1.29968800 | -0.88919400 |
| H | 3.05816000  | -0.52845800 | -1.92983700 |
| F | -0.00254700 | 0.00006700  | -1.80960000 |
| N | 0.00104900  | -0.00011200 | 2.04036900  |
| H | -2.54697500 | 2.33814000  | 1.03039400  |
| H | 1.95157500  | 2.40832000  | -1.22345600 |
| H | 1.73877100  | -2.76980000 | -0.98225300 |
| C | -3.35846700 | 0.69663000  | -0.89097700 |
| C | -3.59995800 | -0.63940200 | -0.15621600 |
| H | -4.27172500 | 1.29991400  | -0.89075400 |
| H | -3.05565500 | 0.52873600  | -1.92989400 |
| H | -3.96220000 | -0.47348700 | 0.86463900  |
| H | -4.35097600 | -1.23310800 | -0.68667500 |
| H | -1.73827600 | 2.77062600  | -0.97996100 |
| H | -1.95104400 | -2.40941900 | -1.22158700 |

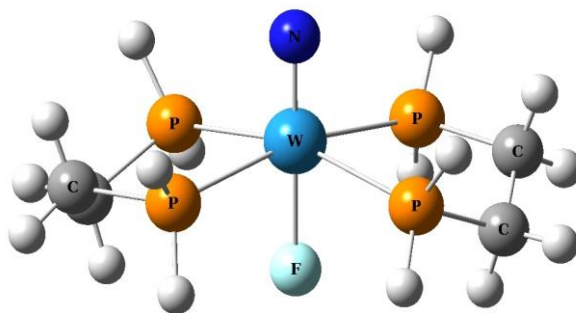

**[F-W=NH (dpe)] (5)**

|   |             |             |             |
|---|-------------|-------------|-------------|
| W | -0.03057000 | 0.00181400  | 0.17987900  |
| P | -1.92003700 | -1.58817900 | -0.08686800 |
| H | -2.18333900 | -2.69340200 | 0.80517200  |
| P | -1.90473000 | 1.59377000  | -0.09336700 |
| H | -2.36704500 | 2.38793100  | 1.02974700  |
| P | 1.92135000  | 1.62403000  | -0.03067300 |
| H | 2.19014300  | 2.69986600  | 0.88188200  |
| P | 1.92864600  | -1.62889000 | 0.02210100  |
| C | -3.62997800 | -0.69376600 | 0.01812500  |
| C | -3.55046400 | 0.71025000  | -0.60269800 |
| H | -3.87971000 | -0.63497300 | 1.08520200  |
| H | -4.39107000 | -1.30583000 | -0.47853600 |
| H | -4.40137800 | 1.32900000  | -0.29499800 |
| H | -3.54423400 | 0.65213600  | -1.69762700 |
| F | 0.29343800  | -0.06015500 | -1.88965600 |
| N | 0.03640100  | 0.02377300  | 2.01673400  |
| H | 2.44565500  | -2.24078400 | 1.21439300  |
| H | -2.04551600 | -2.30607000 | -1.33017200 |
| H | -1.90207000 | 2.65203100  | -1.07290000 |
| C | 3.48370200  | -0.69564100 | -0.62819800 |
| C | 3.60673100  | 0.68810800  | 0.03703700  |
| H | 4.38009800  | -1.29824200 | -0.44511900 |
| H | 3.34471000  | -0.59653900 | -1.71103100 |
| H | 3.86719000  | 0.58786900  | 1.09827000  |
| H | 4.38158400  | 1.28993200  | -0.45052400 |
| H | 1.96285000  | -2.77508800 | -0.84561000 |
| H | 2.06155100  | 2.33316200  | -1.26985700 |
| H | -0.39134200 | 0.09508200  | 2.94695800  |

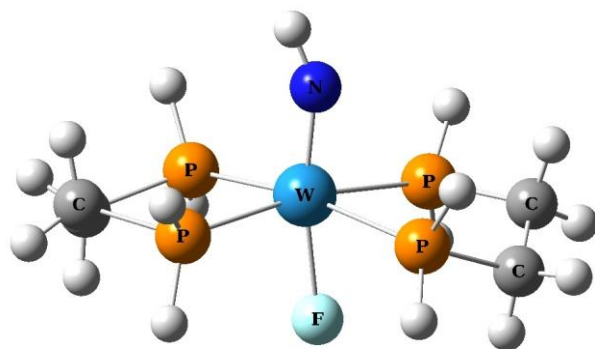

**[F-W-NH<sub>2</sub>(dpe)]<sup>+</sup> (6)**

|   |             |             |             |
|---|-------------|-------------|-------------|
| W | 0.00001900  | -0.00002000 | 0.16970400  |
| P | -1.96373700 | -1.62347600 | -0.07647100 |
| H | -2.20306000 | -2.71652000 | 0.81386600  |
| P | -1.95387600 | 1.63176700  | -0.03695000 |
| H | -2.43765900 | 2.27010600  | 1.15082900  |
| P | 1.96365700  | 1.62351200  | -0.07593200 |
| H | 2.20308700  | 2.71570700  | 0.81541300  |
| P | 1.95382800  | -1.63174600 | -0.03653700 |
| C | -3.64012800 | -0.68571900 | -0.04439600 |
| C | -3.50360000 | 0.70681700  | -0.69066300 |
| H | -3.94499200 | -0.60531800 | 1.00618400  |
| H | -4.39721800 | -1.27898000 | -0.56669300 |
| H | -4.39621300 | 1.31073600  | -0.49947000 |
| H | -3.37585600 | 0.62395400  | -1.77609300 |
| F | 0.00065600  | 0.00008900  | -1.82556900 |
| N | -0.00041300 | -0.00016100 | 2.12428100  |
| H | 2.43770700  | -2.27035700 | 1.15104200  |
| H | -2.01126700 | -2.30138000 | -1.33442000 |
| H | -1.89758100 | 2.76314700  | -0.91096800 |
| C | 3.50343900  | -0.70687400 | -0.69069000 |
| C | 3.64019100  | 0.68581700  | -0.04486300 |
| H | 4.39607000  | -1.31078800 | -0.49954900 |
| H | 3.37540700  | -0.62431300 | -1.77610600 |
| H | 3.94582000  | 0.60575100  | 1.00550800  |
| H | 4.39676900  | 1.27908200  | -0.56789400 |
| H | 1.89715700  | -2.76291700 | -0.91079900 |
| H | 2.01095400  | 2.30264300  | -1.33321800 |
| H | -0.82386200 | 0.11835000  | 2.72306300  |
| H | 0.82285700  | -0.11819900 | 2.72340300  |

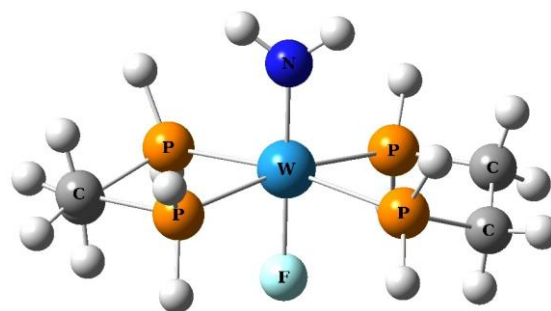

**[F-W-NH<sub>3</sub>(dpe)] (7)**

|   |             |             |             |
|---|-------------|-------------|-------------|
| W | 0.00277400  | -0.01074300 | 0.11780100  |
| P | 1.86031700  | 1.58337800  | -0.09115800 |
| H | 2.18826200  | 2.73064300  | 0.73802700  |
| P | 1.90247600  | -1.55778300 | -0.08606200 |
| H | 2.38434400  | -2.28346600 | 1.08964000  |
| P | -1.87985600 | -1.56781500 | -0.21832000 |
| H | -2.20660100 | -2.77782400 | 0.51348500  |
| P | -1.89643100 | 1.58044300  | 0.13167200  |
| C | 3.61778400  | 0.74901900  | -0.06980800 |
| C | 3.54322600  | -0.67473000 | -0.63747000 |
| H | 3.95447000  | 0.74149000  | 0.97503400  |
| H | 4.31039800  | 1.37239200  | -0.64682300 |
| H | 4.40249500  | -1.28137400 | -0.32929600 |
| H | 3.50958400  | -0.65292900 | -1.73347200 |
| F | -0.12154700 | 0.19428000  | -1.96741400 |
| N | 0.08715500  | -0.25977300 | 2.43804700  |
| H | -2.41721300 | 2.23955500  | 1.31761000  |
| H | 1.92757100  | 2.28216200  | -1.36136900 |
| H | 1.97809800  | -2.69430000 | -0.98336700 |
| C | -3.51888200 | 0.75512800  | -0.54640600 |
| C | -3.62126900 | -0.71007100 | -0.10155300 |
| H | -4.38778500 | 1.33922300  | -0.22277300 |
| H | -3.44069000 | 0.82133900  | -1.63803500 |
| H | -3.94957400 | -0.78511200 | 0.94347000  |
| H | -4.33193400 | -1.26598700 | -0.72374200 |
| H | -1.90977200 | 2.75911700  | -0.70833900 |
| H | -1.97651300 | -2.14274600 | -1.54357800 |
| H | 0.88897800  | -0.83524000 | 2.70640200  |
| H | 0.20081700  | 0.68334600  | 2.81457500  |
| H | -0.76912300 | -0.67483700 | 2.80514500  |

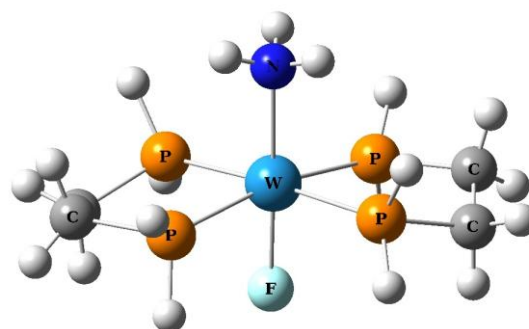



[C<sub>6</sub>F<sub>5</sub>B]

|   |             |             |             |
|---|-------------|-------------|-------------|
| B | -0.00128400 | 0.00029500  | 0.00286000  |
| C | 1.48009800  | -0.51423700 | 0.00192400  |
| C | 2.49295600  | 0.10004100  | 0.76439300  |
| C | 1.89295300  | -1.62364800 | -0.76173300 |
| C | 3.81645100  | -0.34839900 | 0.78565100  |
| C | 3.20960300  | -2.09150200 | -0.78618000 |
| C | 4.17663300  | -1.45008900 | -0.00116800 |
| C | -1.18733500 | -1.02576500 | 0.00271800  |
| C | -2.36265900 | -0.82205300 | -0.74749200 |
| C | -1.15339400 | -2.21864400 | 0.75212600  |
| C | -3.42541800 | -1.72929400 | -0.77088000 |
| C | -2.20230400 | -3.14194400 | 0.77366800  |
| C | -3.34451000 | -2.89573200 | 0.00087700  |
| C | -0.29550300 | 1.54089100  | 0.00054100  |
| C | -1.34365000 | 2.11122200  | 0.75010500  |
| C | 0.47010000  | 2.45403700  | -0.75124300 |
| C | -1.61467800 | 3.48206200  | 0.77131800  |
| C | 0.21950000  | 3.82868100  | -0.77557000 |
| C | -0.82850100 | 4.34537200  | -0.00274600 |
| F | -4.54405200 | -1.48848600 | -1.53871200 |
| F | -2.48167800 | 0.31403600  | -1.53783200 |
| F | -4.38238000 | -3.79590400 | -0.00019700 |
| F | -2.12332000 | -4.28416000 | 1.54043000  |
| F | -0.04671200 | -2.49800900 | 1.54388300  |
| F | 0.96976000  | -2.28203300 | -1.56429100 |
| F | 3.56240400  | -3.17030300 | -1.56766000 |
| F | 5.47470000  | -1.90024500 | -0.00300900 |
| F | 4.76322600  | 0.27909300  | 1.56591600  |
| F | 2.17789800  | 1.18771000  | 1.56918000  |
| F | 1.51027800  | 1.98499400  | -1.54344900 |
| F | 0.98861300  | 4.67422700  | -1.54521600 |
| F | -1.08458000 | 5.69519100  | -0.00420400 |
| F | -2.64157600 | 3.98823100  | 1.53824800  |
| F | -2.14209600 | 1.29482700  | 1.54111700  |

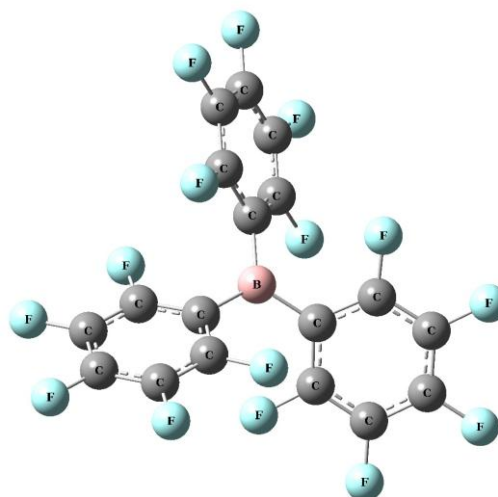

[C<sub>6</sub>F<sub>5</sub>BH]<sup>-</sup>

|   |             |             |             |
|---|-------------|-------------|-------------|
| B | -0.00202700 | -0.00182000 | 0.76041800  |
| C | 0.36126700  | 1.53319600  | 0.32972900  |
| C | 1.27715200  | 1.92764000  | -0.65888400 |
| C | -0.23216000 | 2.60875500  | 1.01605000  |
| C | 1.59518300  | 3.26234800  | -0.94725200 |
| C | 0.04651300  | 3.95636200  | 0.76164000  |
| C | 0.97560000  | 4.28762200  | -0.22946100 |
| C | -1.51240300 | -0.45560300 | 0.32815900  |
| C | -2.14803800 | -1.50540800 | 1.01660800  |
| C | -2.31126500 | 0.13885200  | -0.66196200 |
| C | -3.45447500 | -1.93777400 | 0.76270400  |
| C | -3.62634000 | -0.25306200 | -0.94988600 |
| C | -4.20512300 | -1.30064400 | -0.23022900 |
| C | 1.14776700  | -1.08216300 | 0.33038600  |
| C | 1.03619600  | -2.07048000 | -0.66090100 |
| C | 2.37441500  | -1.10468000 | 1.01945900  |
| C | 2.03589600  | -3.01031500 | -0.94907500 |
| C | 3.40472900  | -2.01698600 | 0.76549500  |
| C | 3.23180500  | -2.98531900 | -0.22830600 |
| F | -4.01716400 | -2.98509200 | 1.48325100  |
| F | -1.45381400 | -2.19094200 | 2.01584700  |
| F | -5.50613900 | -1.70656200 | -0.49863300 |
| F | -4.35956300 | 0.38201100  | -1.94556400 |
| F | -1.80313400 | 1.17593200  | -1.45128000 |
| F | -1.17607000 | 2.35123300  | 2.01255100  |
| F | -0.58128200 | 4.96750100  | 1.48008800  |
| F | 1.27418700  | 5.61724500  | -0.49853600 |
| F | 2.51314300  | 3.57943000  | -1.94177700 |
| F | 1.92264000  | 0.96903000  | -1.44696200 |
| F | 2.61849000  | -0.15950800 | 2.01815600  |
| F | 4.59257100  | -1.97763200 | 1.48665300  |
| F | 4.23696200  | -3.90558200 | -0.49722300 |
| F | 1.85611400  | -3.96147400 | -1.94672000 |
| F | -0.11323500 | -2.14921800 | -1.45393800 |
| H | -0.00352800 | -0.00227400 | 1.96903400  |

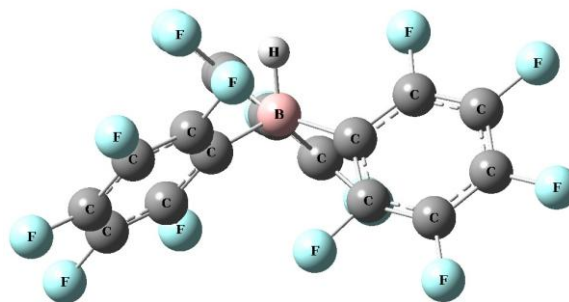

**[(<sup>i</sup>Pr)<sub>2</sub>NH]**

|   |             |             |             |
|---|-------------|-------------|-------------|
| N | 0.01503200  | -0.59740800 | -0.04678400 |
| H | -0.10789400 | -1.38061200 | 0.59829700  |
| C | -1.25328600 | 0.14929800  | -0.22462500 |
| C | -1.70072100 | 0.95747300  | 1.02466100  |
| H | -1.10067600 | 0.85725500  | -1.05076800 |
| H | -2.61922900 | 1.52264900  | 0.81480500  |
| H | -1.90258300 | 0.28253700  | 1.86921400  |
| H | -0.93124300 | 1.67440600  | 1.33858700  |
| C | 1.26583800  | 0.14642200  | 0.23792400  |
| C | 2.37583300  | -0.87780800 | 0.54748700  |
| H | 1.16011300  | 0.80449000  | 1.12518500  |
| H | 3.32146300  | -0.37040700 | 0.77618200  |
| H | 2.11101200  | -1.50149000 | 1.41386600  |
| H | 2.53072000  | -1.53847800 | -0.31493900 |
| C | -2.34801000 | -0.84749400 | -0.65424300 |
| C | 1.66133800  | 1.03391000  | -0.96116700 |
| H | -2.04311200 | -1.37779300 | -1.56352400 |
| H | -3.29799800 | -0.33212100 | -0.84547700 |
| H | -2.52580300 | -1.59489500 | 0.13396500  |
| H | 1.76650600  | 0.41713900  | -1.86250500 |
| H | 2.61607300  | 1.53911100  | -0.76320800 |
| H | 0.91147600  | 1.80924900  | -1.16241000 |

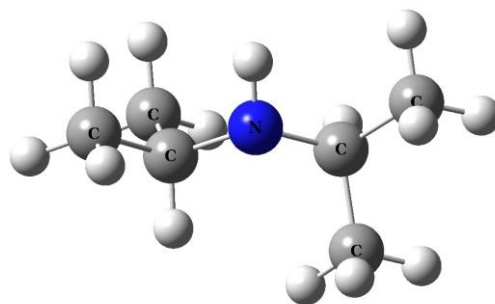

$[(i\text{Pr})_2\text{NH}_2]^+$

|   |             |             |             |
|---|-------------|-------------|-------------|
| N | 0.00000800  | -0.00015500 | -0.58134600 |
| H | -0.10794500 | -0.82285700 | -1.19166700 |
| C | -1.31442200 | 0.15758600  | 0.23785500  |
| C | -1.75298100 | -1.21832200 | 0.76322900  |
| H | -1.05407700 | 0.81918700  | 1.07002800  |
| H | -2.64061200 | -1.09129000 | 1.39156800  |
| H | -2.02890700 | -1.89353900 | -0.05798900 |
| H | -0.98834900 | -1.70360700 | 1.38018000  |
| C | 1.31445100  | -0.15762300 | 0.23791000  |
| C | 2.36943000  | -0.82657300 | -0.65759300 |
| H | 1.05419700  | -0.81928100 | 1.07007300  |
| H | 3.28928500  | -0.97346400 | -0.08218900 |
| H | 2.04639300  | -1.81483400 | -1.01064500 |
| H | 2.62313400  | -0.20386400 | -1.52542200 |
| C | -2.36927100 | 0.82672400  | -0.65765700 |
| C | 1.75278300  | 1.21836000  | 0.76326700  |
| H | -2.04602400 | 1.81489700  | -1.01076400 |
| H | -3.28907900 | 0.97385000  | -0.08223900 |
| H | -2.62313800 | 0.20403400  | -1.52545200 |
| H | 2.02857400  | 1.89361600  | -0.05796300 |
| H | 2.64045600  | 1.09147300  | 1.39157700  |
| H | 0.98810400  | 1.70353700  | 1.38023700  |
| H | 0.10798600  | 0.82231400  | -1.19197700 |

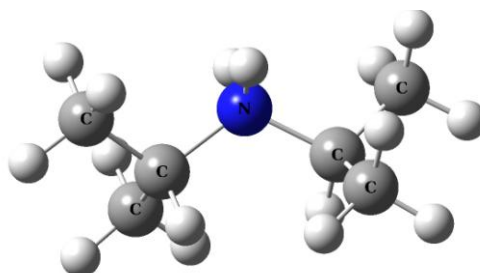

**N<sub>2</sub>**

|   |            |            |             |
|---|------------|------------|-------------|
| N | 0.00000000 | 0.00000000 | 0.56666800  |
| N | 0.00000000 | 0.00000000 | -0.56666800 |

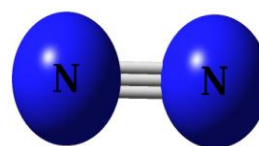

**NH<sub>3</sub>**

|   |             |             |            |
|---|-------------|-------------|------------|
| N | 0.00000000  | 0.00000000  | 0.00000000 |
| H | 0.00000000  | 1.00522200  | 0.00000000 |
| H | 0.87054800  | -0.50261100 | 0.00000000 |
| H | -0.87054800 | -0.50261100 | 0.00000000 |

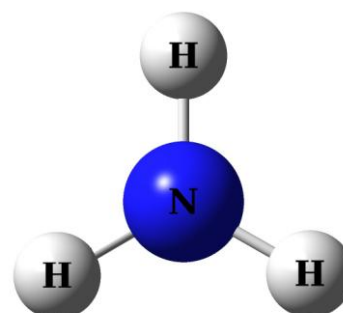

Supplement: c2nj20929b.pdf [file c2nj20929b.pdf]
